# Supplementary material for: Algivore or Phototroph? Plakobranchus ocellatus (Gastropoda) Continuously Acquires Kleptoplasts and Nutrition from Multiple Algal Species in Nature
Source: PLoS One. 2012 Jul 25;7(7):e42024. doi: 10.1371/journal.pone.0042024 (PMC3404988; doi:10.1371/journal.pone.0042024)
Supplement: Table S2 — (XLS) [file pone.0042024.s003.xls]

## Sheet: Table S2
Table S2. Previously reported TPGlu/Phe values of various organism
Ecological categories	Species	TPGlu/Phe	Location	Lat/Long	Reference
Algae/Primaery producers	Acaryochloris marina (cyanobacterium)	1.1	Cultured	-	Chikaraishi et al. 2009*
	Anabaena cylindrica (cyanobacterium)	1.1	Cultured	-	Chikaraishi et al. 2009*
	Nostoc sp. (cyanobacterium) (n=2)	1.0, 0.9	Cultured	-	Chikaraishi et al. 2009*
	Oscillatoria sancta (cyanobacterium)	0.9	Cultured	-	Chikaraishi et al. 2009*
	Trichodesmium sp. (cyanobacterium)	0.8	Cultured	-	McClelland et al. 2003†
	Synechococcus sp. (cyanobacterium) (n=2)	1.0, 1.0	Cultured	-	Chikaraishi et al. 2009*
	Nostoc commune (cyanobacterium)	1.0	Land in Japan	34°54′N, 135°48′E	Chikaraishi et al. 2009*
	Boergesenia forbesii (ulovophycean green algae)	1.0	Cultured	-	Chikaraishi et al. 2009*
	Chlorella sp. (green algae) (n=2)	0.8, 0.9	Cultured	-	Chikaraishi et al. 2009*
	Donaeliella sp.(green algae) (n=2)	1.1, 1.0	Cultured	-	Chikaraishi et al. 2009*
	Tetraselmis suecica (green algae) (n=2)	1.2, 1.1	Cultured	-	McClelland and Montoya 2002‡
	Prasiola japonica (green algae)	1.1	River in Japan	34°45′N, 138°47′E	Chikaraishi et al. 2009*
	Gelidium japonicum (red algae)	0.9	Temperate Pacific Ocean	35° 08’ N, 139° 07’ E	Chikaraishi et al. 2009*
	Binghamia californica (red algae)	1.2	Temperate Pacific Ocean	35° 08’ N, 139° 07’ E	Chikaraishi et al. 2007§
	Sargassum filicinumn (brown algae)	1.0	Temperate Pacific Ocean	35° 08’ N, 139° 07’ E	Chikaraishi et al. 2009*
	Sargassum filicinum (brown algae)	0.8	Temperate Pacific Ocean	35° 08’ N, 139° 07’ E	Chikaraishi et al. 2007§
	Undaria pinnatifida (brown algae)	0.8	Temperate Pacific Ocean	35° 08’ N, 139° 07’ E	Chikaraishi et al. 2007§
	Rhizosolenia sp. (diatom)	1.0	Tropical Pacific Ocean	2°N, 140°W	McCarthy et al. 2007†
	Mixture of "ice algaes"	0.9	Antarctic Ocean	-	Chikaraishi et al. 2009*
Algivorse/Primary consumers	Brachionus plicatilis (rotifer) (n=2)	1.8, 1.9	Cultured	-	Chikaraishi et al. 2009*
	Brachionus plicatilis (n=2)	2.0, 2.0	Cultured	-	McClelland and Montoya 2002‡
	Batillus cornutus (turban shell)	2.0	Temperate Pacific Ocean	35° 08’ N, 139° 07’ E	Chikaraishi et al. 2007§
	Haliotis discus (abalone)	1.7	Temperate Pacific Ocean	35° 08’ N, 139° 07’ E	Chikaraishi et al. 2007§
	Omphalius pfeifferi (snail)	1.9	Temperate Pacific Ocean	35° 08’ N, 139° 07’ E	Chikaraishi et al. 2007§
Omnivores	Pachygrapsus crassipes (crab)	2.6	Temperate Pacific Ocean	35°08′N, 139°07′E	Chikaraishi et al. 2009*
	Plagusia dentipes (crab)	2.6	Temperate Pacific Ocean	35°08′N, 139°07′E	Chikaraishi et al. 2009*
	Percnon planissimum (crab)	2.3	Temperate Pacific Ocean	35°08′N, 139°07′E	Chikaraishi et al. 2009*
	Acanthopagrus schlegeli (fish)	2.4	Temperate Pacific Ocean	35°08′N, 139°07′E	Chikaraishi et al. 2009*
	Girella punctata (fish)	2.4	Temperate Pacific Ocean	35°08′N, 139°07′E	Chikaraishi et al. 2009*
Carnivore/Higher level consumers	Paralichthys olivaceus (fish)	3.1	Cultured	-	Chikaraishi et al. 2009*
	Sebastes shlegeli (fish)	2.9	Cultured	-	Chikaraishi et al. 2009*
	Thunnus albacares (fish)	4.7	Tropical Pacific Ocean	8° 13.8’S, 110.32°W	Popp et al. 2007#
	Thunnus albacares (fish)	4.7	Tropical Pacific Ocean	1° 10.8’S, 136.27°W	Popp et al. 2007#
	Thunnus albacares (fish)	4.1	Tropical Pacific Ocean	10° 31.8’N, 109.02°W	Popp et al. 2007#
	Thunnus albacares (fish)	4.2	Tropical Pacific Ocean	13° 45.0’N, 113.07°W	Popp et al. 2007#
	Thunnus albacares (fish)	4.3	Tropical Pacific Ocean	24° 15.0’N, 112.32°W	Popp et al. 2007#
*Chikaraishi Y, Ogawa NO, Kashiyama Y, Takano Y, Suga H, et al. (2009) Determination of aquatic food-web structure based on compound-specific nitrogen isotopic composition of amino acids. Limnology and Oceanography-Methods 7: 740-750.
†McClelland JW, Holl CM, Montoya JP (2003) Relating low δ15N values of zooplankton to N2-fixation in the tropical North Atlantic. Oceanographic Research Papers 50: 849-861.
‡McClelland JW, Montoya JP (2002) Trophic relationships and the nitrogen isotopic composition of amino acids in plankton. Ecology 83: 2173-2180.
§1. Chikaraishi Y, Kashiyamal Y, Ogawa NO, Kitazato H, Ohkouchi N (2007) Metabolic control of nitrogen isotope composition of amino acids in macroalgae and gastropods: implications for aquatic food web studies. Marine Ecology-Progress Series 342: 85-90.
#Popp BN, Graham BS, Olson RJ, Hannides CCS, Lott MJ, et al. (2007) Insight into the trophic ecology of yellowfin tuna, Thunnus albacares, from compound-specific nitrogen isotope analysis of proteinaceous amino acids. Terrestrial Ecology 1: 173-190.
