# Supplementary material for: Algivore or Phototroph? Plakobranchus ocellatus (Gastropoda) Continuously Acquires Kleptoplasts and Nutrition from Multiple Algal Species in Nature
Source: PLoS One. 2012 Jul 25;7(7):e42024. doi: 10.1371/journal.pone.0042024 (PMC3404988; doi:10.1371/journal.pone.0042024)
Supplement: Table S3 — (XLS) [file pone.0042024.s004.xls]

## Sheet: Table S1
	Table S1. Percentage abundance of rbcL sequences from source algae in P. ocellatus*
	Collection		Speicmen number	Percentage abundance (%) of kleptoplast in an individual of Plakobranchus ocellatus
	Year	Date		Rhipidosiphon spp. (clade C)	Rhipidosiphon lewmanomontiae (clade B)	Proposis spp./Halimeda borneensis (clade A/D)	Caulerpella spp. (clade F)	Halimedineae spp. 1/Rhipiliaceae spp. (clade E/G)
050410A_F01.fsa	2005	10-Apr.	Ploc050410A	11.7647	0	0	88.2353	0
050428B_G01.fsa		28-Apr.	Ploc050428A	2.12329	8.73288	4.00685	85.137	0
050428C_H01.fsa		28-Apr.	Ploc050428B	0	18.5158	0	81.4842	0
050428D_G03.fsa		28-Apr.	Ploc050428C	1.17266	61.9086	28.6696	8.24909	0
050523B_C02.fsa		23-May.	Ploc050523A	21.489	0	5.17766	73.3333	0
050523A_B02.fsa		23-May.	Ploc050523B	5.89247	71.2688	14.2366	8.60215	0
050523C_D02.fsa		23-May.	Ploc050523C	0	52.2677	37.7807	9.95156	0
050621I_A01.fsa		21-Jun.	Ploc050621A	42.7538	15.939	4.75329	36.5539	0
050621J_B01.fsa		21-Jun.	Ploc050621B	8	13.2584	36.4045	42.3371	0
050621C_B03.fsa		21-Jun.	Ploc050621C	7.69733	44.4227	34.8337	13.0463	0
050621D_B04.fsa		21-Jun.	Ploc050621D	0	7.46944	0	92.5306	0
050621E_C04.fsa		21-Jun.	Ploc050621E	0	2.37691	0	97.6231	0
050703A_H03.fsa		24-July	Ploc050703A	3.24268	33.4031	3.59135	55.5091	4.25384
050703B_A04.fsa		24-July	Ploc050703B	2.09699	8.69375	7.1647	82.0446	0
050807A_G02.fsa		7-Aug.	Ploc050807A	54.1026	0	20.2564	25.641	0
050807D_F03.fsa		7-Aug.	Ploc050807B	45.0495	30.0838	3.80807	21.0586	0
050807K_A02.fsa		7-Aug.	Ploc050807C	18.6762	3.13101	14.117	64.0758	0
050807L_B02.fsa		7-Aug.	Ploc050807D	29.7721	0	8.17664	62.0513	0
050807N_D02.fsa		7-Aug.	Ploc050807E	19.5129	0	29.7478	48.4198	2.31951
050807J_H01.fsa		7-Aug.	Ploc050807F	49.8909	0	17.7625	28.2954	4.05111
050807F_D01.fsa		7-Aug.	Ploc050807G	28.1928	0	35.6627	25.1566	10.988
050807G_E01.fsa		7-Aug.	Ploc050807H	55.8656	0	2.87585	26.5661	14.6925
050807M_C02.fsa		7-Aug.	Ploc050807I	39.2431	0	5.62468	35.4329	19.6993
050807H_F01.fsa		7-Aug.	Ploc050807J	0	16.3894	9.98152	46.5188	27.1103
050807E_A02.fsa		7-Aug.	Ploc050807K	0	33.9145	0	66.0855	0
050916C_F02.fsa		16-Sep.	Ploc050916A	100	0	0	0	0
050916E_A01.fsa		16-Sep.	Ploc050916B	44.7113	0	49.1058	6.18293	0
050916A_G01.fsa		16-Sep.	Ploc050916C	28.4024	15.5917	21.3609	34.645	0
050916D_H02.fsa		16-Sep.	Ploc050916D	0	0	0	100	0
051113A_C03.fsa		13-Nov.	Ploc051113A	14.6565	19.1294	7.7476	56.6294	1.83706
070517B_F02.fsa	2007	17-May.	Ploc070517A	33.2803	3.81801	4.61343	58.2883	0
070517C_G02.fsa		17-May.	Ploc070517B	7.86609	6.3963	28.6881	57.0495	0
070715A_D080204F_D02.fsa		15-July	Ploc070715A	0	100	0	0	0
070715A_para.fsa		15-July	Ploc070715B	0	100	0	0	0
070715E_D080204J_G02.fsa		15-July	Ploc070715C	0	100	0	0	0
070715G.fsa		15-July	Ploc070715D	4.94942	95.0506	0	0	0
070715H.fsa		15-July	Ploc070715E	6.22275	93.7772	0	0	0
070715F.fsa		15-July	Ploc070715F	7.68142	87.0796	0	5.23894	0
070715D_D080204I_F02.fsa		15-July	Ploc070715G	7.18157	85.2304	0	7.58808	0
070715B_D080204G_E02.fsa		15-July	Ploc070715H	14.1414	56.3131	10.8586	18.6869	0
070815A_D071109A_C01.fsa		15-Aug.	Ploc070815A	0	100	0	0	0
070815C_D071109C_D01.fsa		15-Aug.	Ploc070815B	0	68.75	0	31.25	0
070815G_D071109G_H01.fsa		15-Aug.	Ploc070815C	20.4706	41.8824	0	37.6471	0
070815E_D071109E_F01.fsa		15-Aug.	Ploc070815D	13.7815	28.0672	0	58.1513	0
070815H_D071109H_A02.fsa		15-Aug.	Ploc070815E	20.3991	22.8381	0	56.7627	0
070815F_D071109F_G01.fsa		15-Aug.	Ploc070815F	44.902	20.5882	17.6471	16.8627	0
070815D_D071109D_E01.fsa		15-Aug.	Ploc070815G	0	0	0	100	0
070913A_H02.fsa		13-Sep.	Ploc070913A	11.3688	57.7134	6.08696	24.8309	0
070913C_D071107G_A01.fsa		13-Sep.	Ploc070913B	0	52.8846	0	47.1154	0
070913D_D071107H_B01.fsa		13-Sep.	Ploc070913C	0	44.6903	0	55.3097	0
	*Perecent abundance of rbcL sequences derived from various algae sources was calculated from corresponding peak heights (in relative fluorescence units) in t-RFLP analysis.

## Sheet: Table S2
Table S2. Previously reported TPGlu/Phe values of various organism
Ecological categories	Species	TPGlu/Phe	Location	Lat/Long	Reference
Algae/Primaery producers	Acaryochloris marina (cyanobacterium)	1.1	Cultured	-	Chikaraishi et al. 2009*
	Anabaena cylindrica (cyanobacterium)	1.1	Cultured	-	Chikaraishi et al. 2009*
	Nostoc sp. (cyanobacterium) (n=2)	1.0, 0.9	Cultured	-	Chikaraishi et al. 2009*
	Oscillatoria sancta (cyanobacterium)	0.9	Cultured	-	Chikaraishi et al. 2009*
	Trichodesmium sp. (cyanobacterium)	0.8	Cultured	-	McClelland et al. 2003†
	Synechococcus sp. (cyanobacterium) (n=2)	1.0, 1.0	Cultured	-	Chikaraishi et al. 2009*
	Nostoc commune (cyanobacterium)	1.0	Land in Japan	34°54′N, 135°48′E	Chikaraishi et al. 2009*
	Boergesenia forbesii (ulovophycean green algae)	1.0	Cultured	-	Chikaraishi et al. 2009*
	Chlorella sp. (green algae) (n=2)	0.8, 0.9	Cultured	-	Chikaraishi et al. 2009*
	Donaeliella sp.(green algae) (n=2)	1.1, 1.0	Cultured	-	Chikaraishi et al. 2009*
	Tetraselmis suecica (green algae) (n=2)	1.2, 1.1	Cultured	-	McClelland and Montoya 2002‡
	Prasiola japonica (green algae)	1.1	River in Japan	34°45′N, 138°47′E	Chikaraishi et al. 2009*
	Gelidium japonicum (red algae)	0.9	Temperate Pacific Ocean	35° 08’ N, 139° 07’ E	Chikaraishi et al. 2009*
	Binghamia californica (red algae)	1.2	Temperate Pacific Ocean	35° 08’ N, 139° 07’ E	Chikaraishi et al. 2007§
	Sargassum filicinumn (brown algae)	1.0	Temperate Pacific Ocean	35° 08’ N, 139° 07’ E	Chikaraishi et al. 2009*
	Sargassum filicinum (brown algae)	0.8	Temperate Pacific Ocean	35° 08’ N, 139° 07’ E	Chikaraishi et al. 2007§
	Undaria pinnatifida (brown algae)	0.8	Temperate Pacific Ocean	35° 08’ N, 139° 07’ E	Chikaraishi et al. 2007§
	Rhizosolenia sp. (diatom)	1.0	Tropical Pacific Ocean	2°N, 140°W	McCarthy et al. 2007†
	Mixture of "ice algaes"	0.9	Antarctic Ocean	-	Chikaraishi et al. 2009*
Algivorse/Primary consumers	Brachionus plicatilis (rotifer) (n=2)	1.8, 1.9	Cultured	-	Chikaraishi et al. 2009*
	Brachionus plicatilis (n=2)	2.0, 2.0	Cultured	-	McClelland and Montoya 2002‡
	Batillus cornutus (turban shell)	2.0	Temperate Pacific Ocean	35° 08’ N, 139° 07’ E	Chikaraishi et al. 2007§
	Haliotis discus (abalone)	1.7	Temperate Pacific Ocean	35° 08’ N, 139° 07’ E	Chikaraishi et al. 2007§
	Omphalius pfeifferi (snail)	1.9	Temperate Pacific Ocean	35° 08’ N, 139° 07’ E	Chikaraishi et al. 2007§
Omnivores	Pachygrapsus crassipes (crab)	2.6	Temperate Pacific Ocean	35°08′N, 139°07′E	Chikaraishi et al. 2009*
	Plagusia dentipes (crab)	2.6	Temperate Pacific Ocean	35°08′N, 139°07′E	Chikaraishi et al. 2009*
	Percnon planissimum (crab)	2.3	Temperate Pacific Ocean	35°08′N, 139°07′E	Chikaraishi et al. 2009*
	Acanthopagrus schlegeli (fish)	2.4	Temperate Pacific Ocean	35°08′N, 139°07′E	Chikaraishi et al. 2009*
	Girella punctata (fish)	2.4	Temperate Pacific Ocean	35°08′N, 139°07′E	Chikaraishi et al. 2009*
Carnivore/Higher level consumers	Paralichthys olivaceus (fish)	3.1	Cultured	-	Chikaraishi et al. 2009*
	Sebastes shlegeli (fish)	2.9	Cultured	-	Chikaraishi et al. 2009*
	Thunnus albacares (fish)	4.7	Tropical Pacific Ocean	8° 13.8’S, 110.32°W	Popp et al. 2007#
	Thunnus albacares (fish)	4.7	Tropical Pacific Ocean	1° 10.8’S, 136.27°W	Popp et al. 2007#
	Thunnus albacares (fish)	4.1	Tropical Pacific Ocean	10° 31.8’N, 109.02°W	Popp et al. 2007#
	Thunnus albacares (fish)	4.2	Tropical Pacific Ocean	13° 45.0’N, 113.07°W	Popp et al. 2007#
	Thunnus albacares (fish)	4.3	Tropical Pacific Ocean	24° 15.0’N, 112.32°W	Popp et al. 2007#
*Chikaraishi Y, Ogawa NO, Kashiyama Y, Takano Y, Suga H, et al. (2009) Determination of aquatic food-web structure based on compound-specific nitrogen isotopic composition of amino acids. Limnology and Oceanography-Methods 7: 740-750.
†McClelland JW, Holl CM, Montoya JP (2003) Relating low δ15N values of zooplankton to N2-fixation in the tropical North Atlantic. Oceanographic Research Papers 50: 849-861.
‡McClelland JW, Montoya JP (2002) Trophic relationships and the nitrogen isotopic composition of amino acids in plankton. Ecology 83: 2173-2180.
§1. Chikaraishi Y, Kashiyamal Y, Ogawa NO, Kitazato H, Ohkouchi N (2007) Metabolic control of nitrogen isotope composition of amino acids in macroalgae and gastropods: implications for aquatic food web studies. Marine Ecology-Progress Series 342: 85-90.
#Popp BN, Graham BS, Olson RJ, Hannides CCS, Lott MJ, et al. (2007) Insight into the trophic ecology of yellowfin tuna, Thunnus albacares, from compound-specific nitrogen isotope analysis of proteinaceous amino acids. Terrestrial Ecology 1: 173-190.

## Sheet: Table S3
BRYOPSIDALES
	Caulerpa cf. subserrata
	Caulerpa cupressoides var.lycopodium f.amicorum
	Caulerpa webbiana
	Caulerpa macrophysa
	Caulerpa subserrata
	Codium cf. contractum
	Codium cf. arabicum
	Halimeda borneensis
	Halimeda opuntia
	Chlorodesmis fastigiata
	Rhipidosiphon lewmanomontiae
CLADOPHORALES
	Anadyomene cf. wrightii
	Microdictyon okamurai
SIPHONOCLADALES
	Boodlea coacta
	Chamaedoris orientalis
	Valonia aegagropila
	Boergesenia forbesii
	Dictyosphaeria cavernosa
DASYCLADALES
	Halicoryne wrightii
	Bornetella sphaerica
	Bornetella nitida
	Cymopolia vanbosseae
	Neomeris annulata
	Acetabularia dentata
